# Supplementary material for: Criteria for distinguishing heterogeneous from homogeneous conditions for aromatic diisocyanates in water
Source: Royal Society of Chemistry journal article supplement (doi:10.1039/d4em00200h), 2024-01-01
Supplement: d4em00200h1.pdf [file d4em00200h1.pdf]

*Criteria for distinguishing heterogeneous from homogeneous conditions*

## Supplemental Information – 1 – Tables and Figures

**Table S1** – Nomenclature and structure of selected MDI monomers, homologues, and oligomers. Structures drawn by the authors with PubChem Sketcher V2.4.

DPG = di-propylene glycol; MDA = methylene dianiline; MDI = methylene diphenyl diisocyanate. Log  $K_{ow}$  (octanol-water partition coefficient) values: MDI monomers (measured by Yakabe, 1997); MDA monomers (measured by Macnab, 1999, Yakabe, 1997); MDI homologues and oligomers (calculated by Muuronen et al., 2018); MDA homologues and oligomers (estimated from the corresponding MDI homologues and oligomers by subtracting 1.5 units per  $NH_2$ -group). References included in main article or below.

| Compound                             | Log $K_{ow}$ | Structure                                                                            |
|--------------------------------------|--------------|--------------------------------------------------------------------------------------|
| <i>MDI monomers (MW = 250 g/mol)</i> |              |                                                                                      |
| 4,4'-MDI                             | 4.5          | 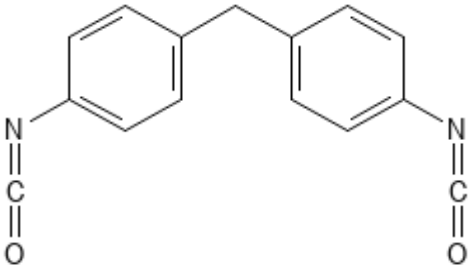   |
| 2,4'-MDI                             | 4.5          |  |

Criteria for distinguishing heterogeneous from homogeneous conditions

| MDI homologues ( $MW = 250 + 131 \times [\text{number of rings} - 2]$ g/mol) |      |                                                                                      |
|------------------------------------------------------------------------------|------|--------------------------------------------------------------------------------------|
| 3-Ring MDI                                                                   | 7.3  | 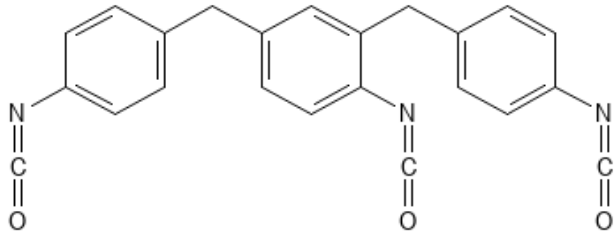   |
| 4-Ring MDI                                                                   | 9.6  |    |
| MDI oligomer ( $MW = 2 \times 250 + MW \text{ diol} (134)$ g/mol)            |      |                                                                                      |
| MDI-DPG                                                                      | 10.4 |  |

Criteria for distinguishing heterogeneous from homogeneous conditions

| MDA monomers (MW = 198 g/mol)                                 |        |                                                                                      |
|---------------------------------------------------------------|--------|--------------------------------------------------------------------------------------|
| 4,4'-MDA                                                      | 1.55   | 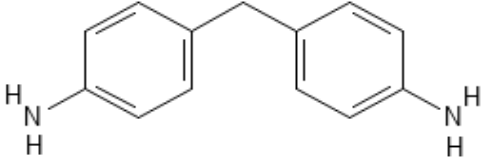   |
| 2,4'-MDA                                                      | 1.8    |    |
| MDA homologues (MW = 198 + 105 x [number of rings - 2] g/mol) |        |                                                                                      |
| 3-Ring MDA                                                    | ca 2.8 |    |
| 4-Ring MDA                                                    | ca 3.6 |  |

Criteria for distinguishing heterogeneous from homogeneous conditions

| MDA oligomer (MW = 2 x 224 + MW diol (134) g/mol)     |                                                                                                                                                                                                                               |                                                                                    |
|-------------------------------------------------------|-------------------------------------------------------------------------------------------------------------------------------------------------------------------------------------------------------------------------------|------------------------------------------------------------------------------------|
| MDA-DPG                                               | ca 7.4                                                                                                                                                                                                                        | 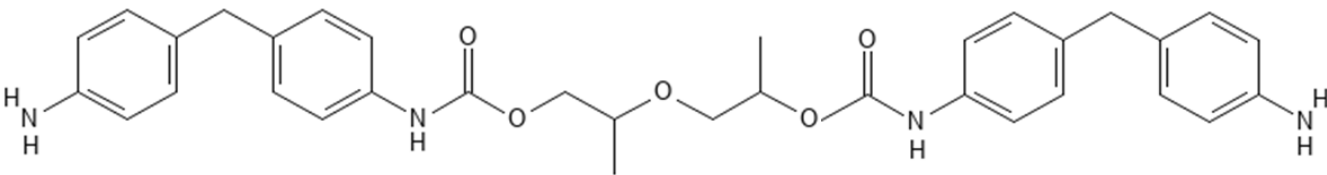 |
| MDI-based ureas (MW and log $K_{ow}$ : see reference) |                                                                                                                                                                                                                               |                                                                                    |
| Please refer to:                                      | <a href="https://www.diisocyanates.org/sites/dii/files/visual_select_file/properties_of_mdi-_and_tdi-ureas_1.pdf">https://www.diisocyanates.org/sites/dii/files/visual_select_file/properties_of_mdi-_and_tdi-ureas_1.pdf</a> |                                                                                    |

Macnab, J. I. (1999). *Determination of physical properties of 4,4'-MDA*. International Isocyanate Institute. Available from: <https://www.bl.uk/onlinegallery/> . Summary available at: [https://www.diisocyanates.org/sites/dii/files/visual\\_select\\_file/phys-chem\\_amines.pdf](https://www.diisocyanates.org/sites/dii/files/visual_select_file/phys-chem_amines.pdf) .

## Criteria for distinguishing heterogeneous from homogeneous conditions

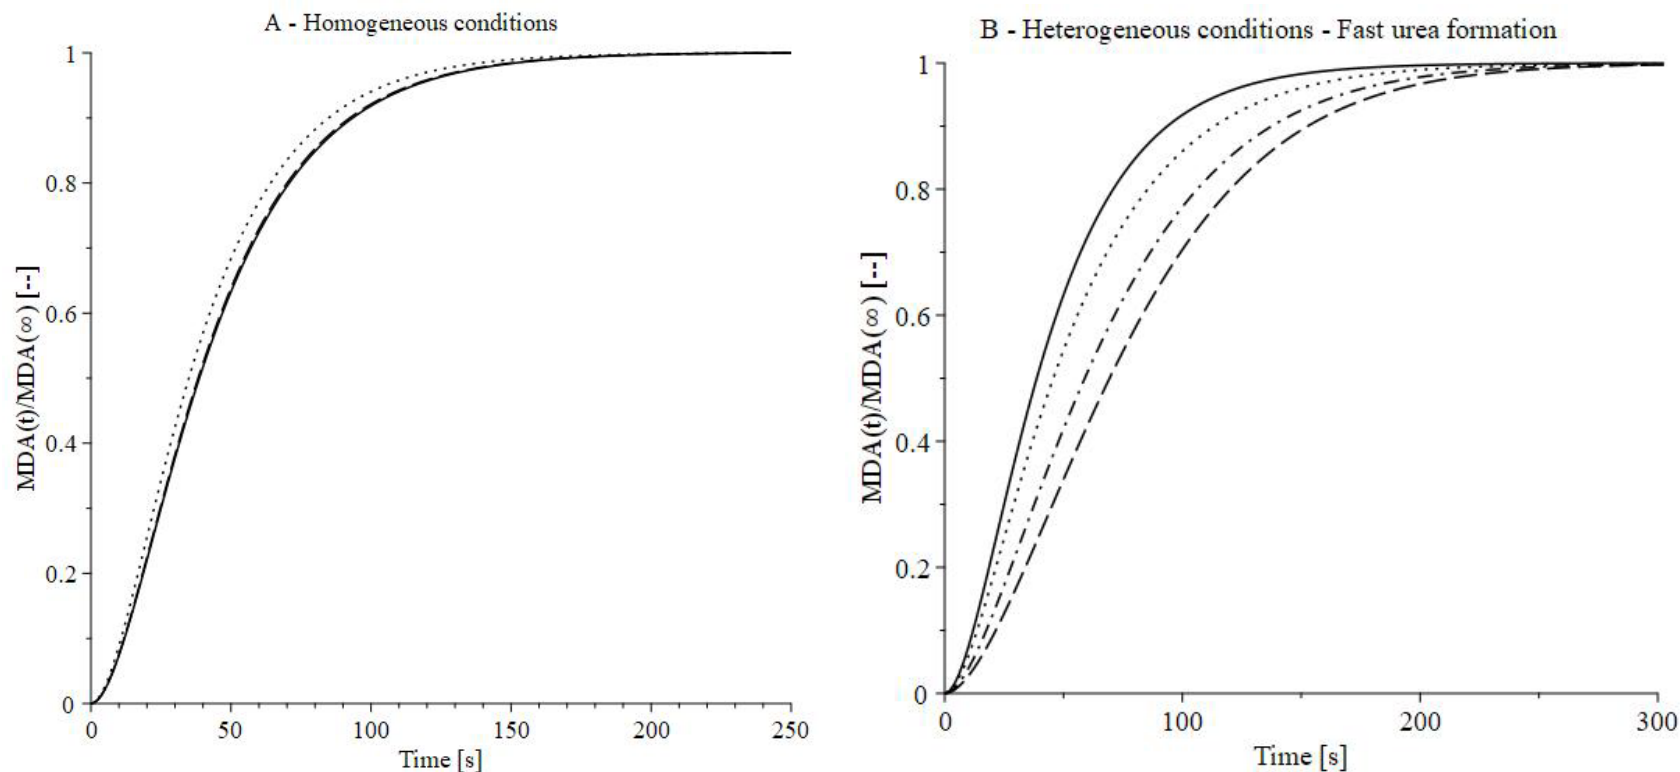

**Figure S1A** (left) – Ratio of MDA yield relative to ultimate MDA yield [ $\text{MDA}(\infty)$ ] as a function of time under hypothetical homogeneous conditions. Line types: solid = 1  $\mu\text{mol/L}$  MDI concentration; dash = 10  $\mu\text{mol/L}$  concentration; dot = 100  $\mu\text{mol/L}$  concentration.

**Figure S1B** (right) - Ratio of MDA yield relative to ultimate MDA yield as a function of time under heterogeneous conditions and at the assumed MDI solubility of 1  $\mu\text{mol/L}$ . Line types: solid = base case at assumed solubility limit (1  $\mu\text{mol/L}$ ); dot = 2  $\mu\text{mol/L}$  loading; dash-dot = 5  $\mu\text{mol/L}$  loading; dash = 10  $\mu\text{mol/L}$  loading. “Fast” urea formation scenario.

Model substance: pure 4,4'-MDI. MDA = methylene dianiline; MDI = methylene diphenyl diisocyanate.

## Criteria for distinguishing heterogeneous from homogeneous conditions

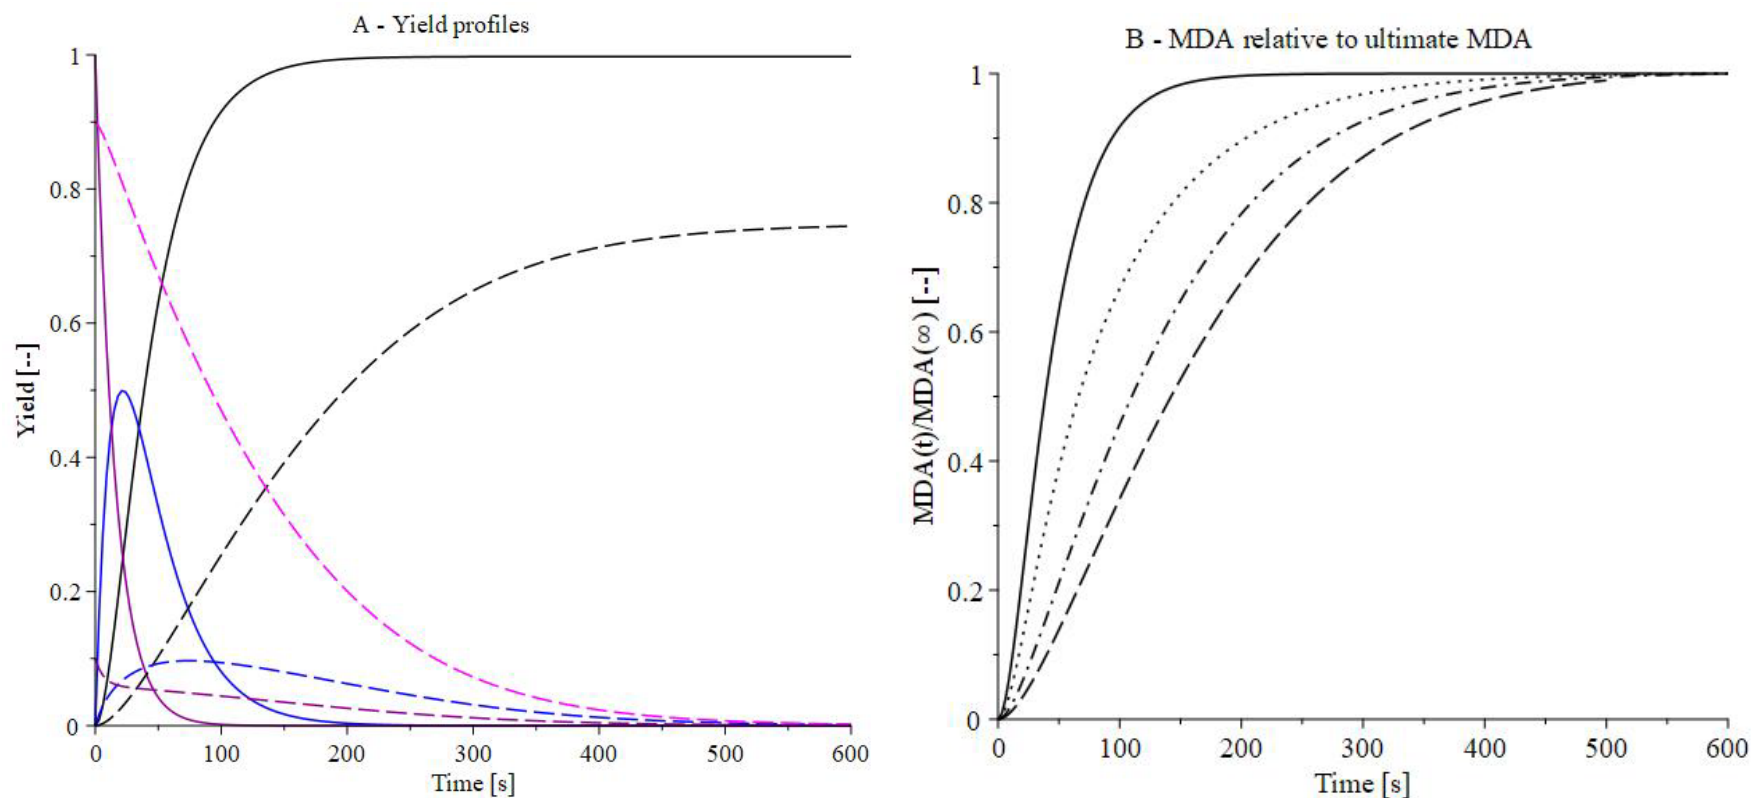

**Figure S2A** (left) - Hydrolysis yields as a function of time under heterogeneous conditions at 10  $\mu\text{mol/L}$  (2.5 mg/L) and at the assumed MDI solubility of 1  $\mu\text{mol/L}$  (0.25 mg/L).

**Figure S2B** (right) - Ratio of MDA yield relative to ultimate MDA yield [ $\text{MDA}(\infty)$ ] as a function of time under heterogeneous conditions and at the assumed MDI solubility of 1  $\mu\text{mol/L}$ .

“Slow” urea formation scenario. Model substance: pure 4,4'-MDI. Line color: violet = MDI dissolved; magenta = MDI in solid phase; blue = MIA; black = MDA. Line types: solid = base case at assumed solubility limit (1  $\mu\text{mol/L}$ ); dot = 2  $\mu\text{mol/L}$  loading; dash-dot = 5  $\mu\text{mol/L}$  loading; dash = 10  $\mu\text{mol/L}$  loading. MDA = methylene dianiline; MDI = methylene diphenyl diisocyanate; MIA = methylene diphenyl amino-isocyanate.

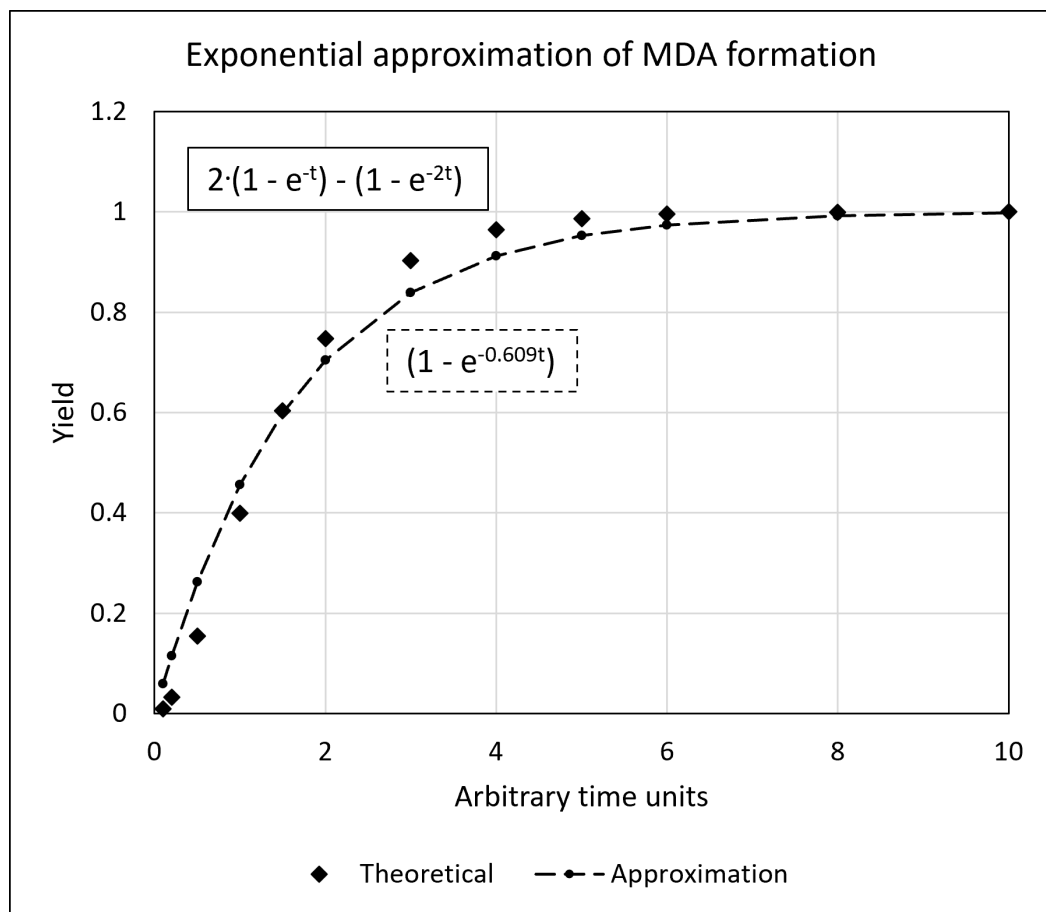

Figure S3 – Approximation of the MDA yield curve by a single exponential approach.

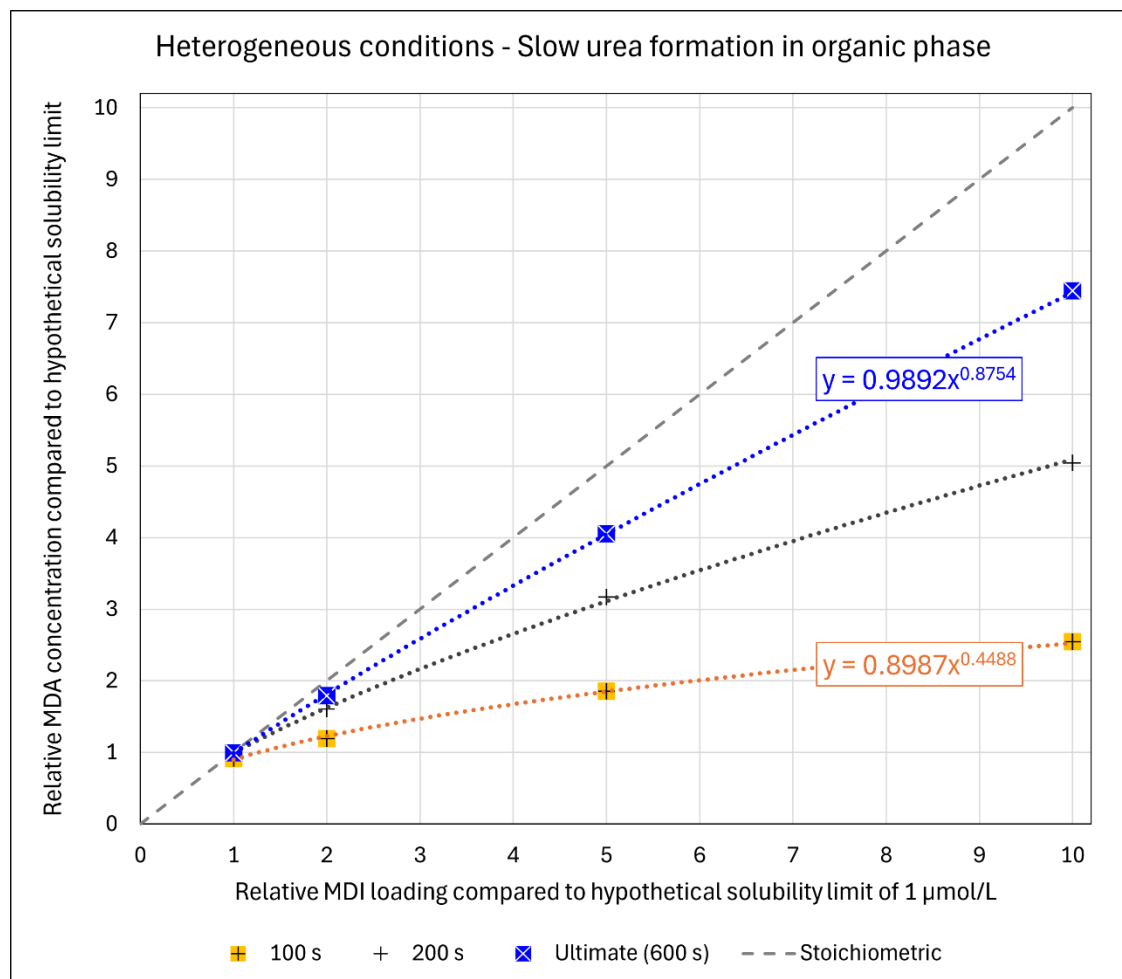

**Figure S4** – Evolution of the MDA yield as a function of time and loading under heterogeneous conditions and the “slow” urea formation scenario.

Blue-filled markers indicate the ultimate yield achieved. The increasing ratio between the blue- and yellow-filled markers illustrates the gradual slowdown of MDA formation as loading exceeds the assumed solubility limit.
